# Supplementary material
Source: Springer Nature journal article supplement (https://www.springermedizin.de/resource/supplementary/13014_2006_42_MOESM3_ESM.pdf/9632798)

# Survival of Hypofractionation-Lung

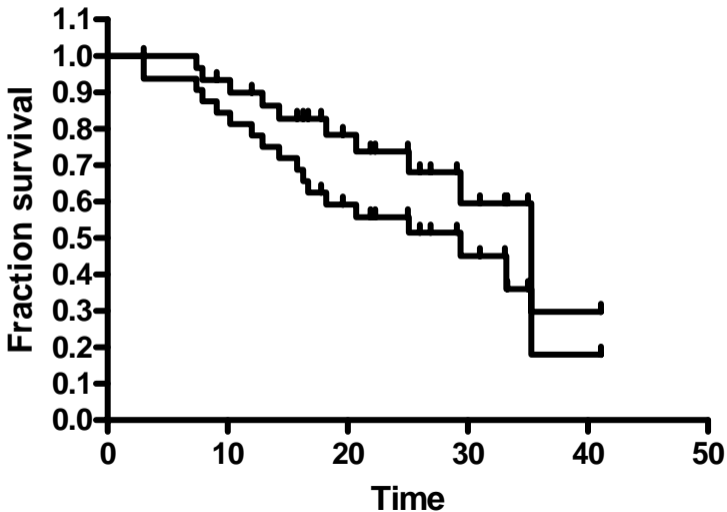

Supplement: MOESM3 [file 9632798]
